# Supplementary material
Source: HighWire-hosted journal article supplement (https://erj.ersjournals.com/content/58/3/2004133)

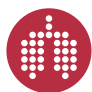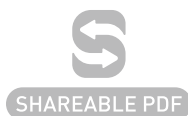

# Altered pulmonary blood volume distribution as a biomarker for predicting outcomes in COVID-19 disease

Michael F. Morris <sup>1,2</sup>, Yash Pershad<sup>3</sup>, Paul Kang<sup>4</sup>, Lauren Ridenour<sup>2</sup>, Ben Lavon<sup>5</sup>, Maarten Lanclus<sup>5</sup>, Rik Godon<sup>5</sup>, Jan De Backer<sup>5</sup> and Marilyn K. Glassberg <sup>2,6</sup>

<sup>1</sup>Dept of Radiology, Banner – University Medical Center Phoenix, Phoenix, AZ, USA. <sup>2</sup>Dept of Medicine, Banner – University Medical Center Phoenix, Phoenix, AZ, USA. <sup>3</sup>Dept of Bioengineering, Stanford University, Palo Alto, CA, USA. <sup>4</sup>Dept of Biostatistics, University of Arizona College of Public Health, Phoenix, AZ, USA. <sup>5</sup>FLUIDDA, New York City, NY, USA. <sup>6</sup>Division of Pulmonary Medicine, Critical Care, and Sleep Medicine, University of Arizona College of Medicine – Phoenix, Phoenix, AZ, USA.

Corresponding author: Michael F. Morris ([michael.morris@bannerhealth.com](mailto:michael.morris@bannerhealth.com))

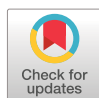

Shareable abstract (@ERSpublications)

**BV5% derived from chest CT may serve as an imaging biomarker for predicting adverse outcomes in patients with COVID-19 seeking acute medical care** <https://bit.ly/2Zg18Vv>

**Cite this article as:** Morris MF, Pershad Y, Kang P, *et al.* Altered pulmonary blood volume distribution as a biomarker for predicting outcomes in COVID-19 disease. *Eur Respir J* 2021; 58: 2004133 [DOI: 10.1183/13993003.04133-2020].

This single-page version can be shared freely online.

Copyright ©The authors 2021.

This version is distributed under the terms of the Creative Commons Attribution Non-Commercial Licence 4.0. For commercial reproduction rights and permissions contact [permissions@ersnet.org](mailto:permissions@ersnet.org)

This article has supplementary material available from [erj.ersjournals.com](http://erj.ersjournals.com)

This article has an editorial commentary: <https://doi.org/10.1183/13993003.00811-2021>

Received: 9 Nov 2020  
Accepted: 3 Feb 2021

## Abstract

**Introduction** Evidence suggests that vascular inflammation and thrombosis may be important drivers of poor clinical outcomes in patients with COVID-19. We hypothesised that a significant decrease in the percentage of blood volume in vessels with a cross-sectional area between 1.25 and 5 mm<sup>2</sup> relative to the total pulmonary blood volume (BV5%) on chest computed tomography (CT) in COVID-19 patients is predictive of adverse clinical outcomes.

**Methods** We performed a retrospective analysis of chest CT scans from 10 hospitals across two US states in 313 COVID-19-positive and 195 COVID-19-negative patients seeking acute medical care.

**Results** BV5% was predictive of outcomes in COVID-19 patients in a multivariate model, with a BV5% threshold below 25% associated with OR 5.58 for mortality, OR 3.20 for intubation and OR 2.54 for the composite of mortality or intubation. A model using age and BV5% had an area under the receiver operating characteristic curve of 0.85 to predict the composite of mortality or intubation in COVID-19 patients. BV5% was not predictive of clinical outcomes in patients without COVID-19.

**Conclusions** The data suggest BV5% as a novel biomarker for predicting adverse outcomes in patients with COVID-19 seeking acute medical care.

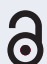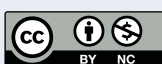

Supplement: inline-supplementary-material-2 [file inline-supplementary-material-2.pdf]
